# Supplementary material for: A deep tumor penetration nanoplatform for glycolysis inhibition and antimetastasis of breast cancer
Source: Royal Society of Chemistry journal article supplement (doi:10.1039/d1tb01759d), 2022-01-01
Supplement: d1tb01759d1.pdf [file d1tb01759d1.pdf]

## Supporting Information

### **A deep tumor penetration nanoplatform for glycolysis inhibition and antimetastasis of breast cancer**

*Jie Zhou,<sup>\*a</sup> Qianwen Yin,<sup>a</sup> Shengnan Li,<sup>a</sup> Ruhe Yang,<sup>a</sup> Rui Lou,<sup>a</sup> Yiwen Sun<sup>a</sup> and Bin  
Du<sup>\*a</sup>*

<sup>a</sup>School of Pharmaceutical Sciences, Zhengzhou University, Zhengzhou 450001,  
China

#### **Corresponding Author**

E-mail: jie\_0822@163.com

E-mail: dubinpaper@sina.com

E-mail: dxy1378@163.com

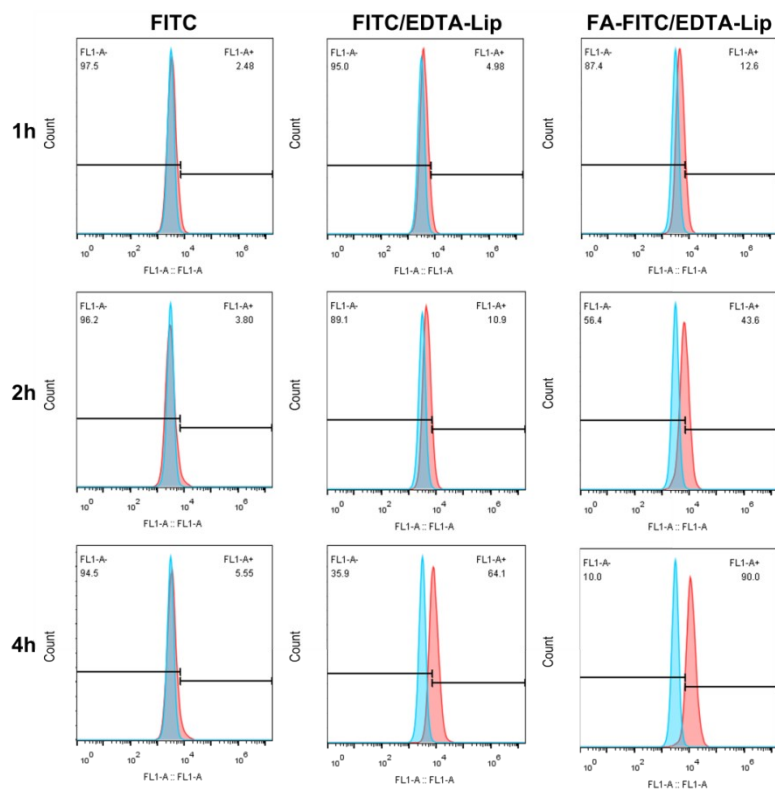

Fig. S1. Internalization amount of FITC, FITC/EDTA-Lip, and FA- FITC/EDTA-Lip determined by flow cytometry in a 4T1 cell at 37 °C for 1、2 and 4h, respectively.

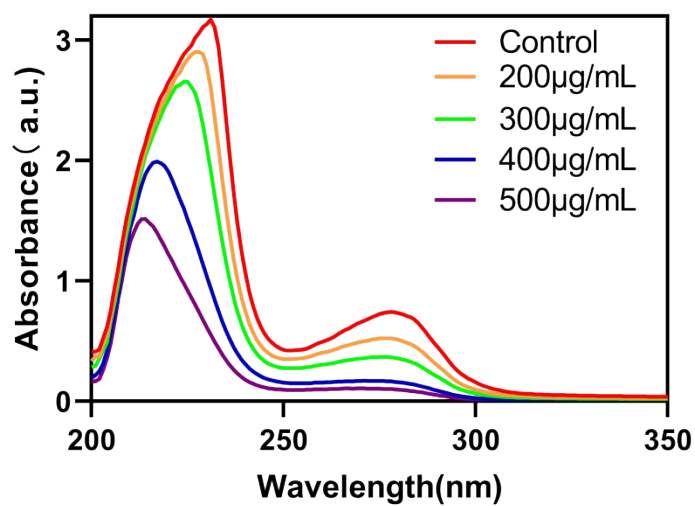

Fig. S2. UV-vis-NIR spectra of cell culture media with or without different concentrations of EDTA solution after incubation with cells for 24 h.
